# Supplementary material for: Biophysical Characterization of Epigallocatechin-3-Gallate Effect on the Cardiac Sodium Channel Nav1.5
Source: PubMed Central journal article supplement (PMC7070937; doi:10.3390/molecules25040902), 2020-02-18
Supplement: molecules-25-00902-s001.pdf [file molecules-25-00902-s001.pdf]

# Biophysical Characterization of Epigallocatechin-3-Gallate Effect on the Cardiac Sodium Channel $\text{Na}_v1.5$

Mohamed-Yassine Amarouch <sup>1,\*</sup>, Han Kurt <sup>2</sup>, Lucie Delemotte <sup>2</sup> and Hugues Abriel <sup>3,\*</sup>

<sup>1</sup> R.N.E Laboratory, Multidisciplinary Faculty of Taza, University Sidi Mohamed Ben Abdellah of Fez, Fez 30000, Morocco

<sup>2</sup> Science for Life Laboratory, Department of Applied Physics, KTH Royal Institute of Technology, Solna, SE-100 44, Sweden; han.kurt@outlook.com (H.K.); lucie.delemotte@scilifelab.se (L.D.)

<sup>3</sup> Institute of Biochemistry and Molecular Medicine (IBMM), University of Bern, 3012 Bern, Switzerland

\* Correspondence: mohamed.amarouch@usmba.ac.ma (M.-Y.A.); hugues.abriel@ibmm.unibe.ch (H.A.)

Academic Editors: Saverio Bettuzzi and Jean-Marc Sabatier

Received: 26 December 2019; Accepted: 15 February 2020; Published: date

## Supplementary Figure

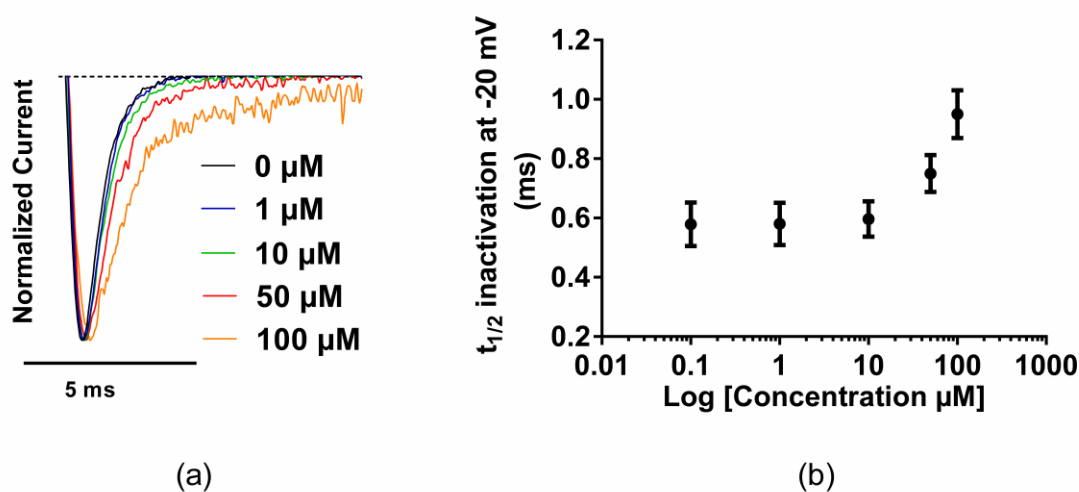

**Supplementary Figure S1:** EGCG dose-dependent effect on the fast inactivation kinetics. (a) Representative traces of normalized  $I_{\text{Na}}$  current in the presence of various EGCG concentrations. (b) EGCG effect on  $I_{\text{Na}}$  inactivation kinetics.
